# Supplementary material for: The Virome of Cerebrospinal Fluid: Viruses Where We Once Thought There Were None
Source: PubMed Central journal article supplement (PMC6742758; doi:10.3389/fmicb.2019.02061), 2019-09-06
Supplement: Data_Sheet_2.pdf [file Data_Sheet_2.pdf]

**Table S2: Contig metrics from study specimens**

|                     | Reads     | Contigs | Mean Length | Max Length | N50   | Percent In Contigs <sup>a</sup> |
|---------------------|-----------|---------|-------------|------------|-------|---------------------------------|
| Body fluids         |           |         |             |            |       |                                 |
| BF2                 | 1,599,812 | 187     | 1,135       | 50,123     | 3,280 | 99.2%                           |
| BF3                 | 549,642   | 653     | 1,106       | 21,402     | 2,040 | 91.9%                           |
| BF4                 | 2,078,202 | 800     | 1,126       | 25,637     | 2,236 | 96.7%                           |
| BF5                 | 833,562   | 807     | 1,230       | 22,142     | 2,836 | 96.4%                           |
| BF6                 | 533,220   | 625     | 1,130       | 33,048     | 2,411 | 96.9%                           |
| Cerebrospinal fluid |           |         |             |            |       |                                 |
| CSF5                | 3,937,012 | 200     | 3,692       | 24,512     | 4,992 | 97.4%                           |
| CSF6                | 2,036,270 | 209     | 3,732       | 41,235     | 5,239 | 97.0%                           |
| CSF7                | 3,210,150 | 306     | 3,131       | 18,757     | 4,174 | 75.9%                           |
| CSF8                | 2,284,002 | 1,942   | 1,190       | 21,506     | 2,426 | 87.0%                           |
| CSF11               | 3,434,702 | 838     | 1,210       | 18,847     | 2,370 | 96.3%                           |
| CSF14               | 1,381,272 | 113     | 3,293       | 17,681     | 4,138 | 86.3%                           |
| CSF16               | 2,820,892 | 1,327   | 1,234       | 17,063     | 2,455 | 96.6%                           |
| CSF17               | 1,014,736 | 251     | 2,862       | 22,913     | 3,448 | 95.0%                           |
| CSF20               | 1,871,550 | 417     | 2,703       | 16,895     | 3,384 | 78.9%                           |
| CSF22               | 2,374,046 | 168     | 2,987       | 26,239     | 3,743 | 92.5%                           |
| CSF25               | 1,500,202 | 1,395   | 1,025       | 17,680     | 1,712 | 96.4%                           |
| CSF26               | 2,099,950 | 390     | 3,198       | 36,466     | 4,060 | 95.1%                           |
| CSF27               | 2,021,242 | 1,210   | 1,095       | 15,755     | 1,961 | 98.2%                           |
| CSF29               | 1,087,248 | 239     | 3,216       | 18,964     | 4,187 | 94.0%                           |
| CSF31               | 2,613,976 | 225     | 3,284       | 24,562     | 4,601 | 94.1%                           |
| CSF33               | 1,452,374 | 133     | 3,273       | 18,858     | 4,359 | 96.6%                           |
| CSF34               | 628,986   | 86      | 3,178       | 15,067     | 4,235 | 94.0%                           |
| CSF37               | 1,053,472 | 1,054   | 1,114       | 20,197     | 2,062 | 97.7%                           |
| CSF38               | 1,075,856 | 1,241   | 1,089       | 17,436     | 1,978 | 88.2%                           |
| CSF42               | 3,204,546 | 1,463   | 1,099       | 20,488     | 2,026 | 88.9%                           |
| Plasma              |           |         |             |            |       |                                 |
| PL101               | 1,302,136 | 110     | 2,789       | 16,468     | 3,248 | 91.3%                           |
| PL102               | 820,614   | 216     | 2,714       | 10,100     | 3,088 | 98.3%                           |

|                |           |     |       |        |       |       |
|----------------|-----------|-----|-------|--------|-------|-------|
| PL103          | 199,598   | 181 | 2,339 | 9,416  | 2,754 | 93.9% |
| PL104          | 1,165,144 | 175 | 2,735 | 12,977 | 3,500 | 98.0% |
| PL105          | 1,571,212 | 278 | 2,801 | 15,312 | 3,433 | 98.7% |
| PL106          | 1,381,986 | 245 | 2,726 | 25,293 | 3,405 | 97.8% |
| PL107          | 964,986   | 314 | 3,123 | 48,877 | 3,975 | 98.3% |
| PL108          | 472,864   | 172 | 2,495 | 10,847 | 2,678 | 98.0% |
| PL109B         | 1,368,514 | 151 | 4,011 | 48,449 | 7,418 | 99.0% |
| PL110A         | 1,447,334 | 360 | 3,057 | 13,733 | 3,057 | 97.7% |
| <hr/>          |           |     |       |        |       |       |
| Water Controls |           |     |       |        |       |       |
| Water 1        | 1,414,660 | 211 | 2,826 | 40,392 | 4,166 | 94.4% |
| Water 2        | 2,395,396 | 127 | 3,191 | 22,204 | 4,316 | 86.1% |
| Water 3        | 2,050,120 | 148 | 3,514 | 26,044 | 5,006 | 94.7% |
| <hr/>          |           |     |       |        |       |       |

<sup>a</sup>Percentage of reads that were assembled into contigs
